# Supplementary material for: Phytoestrogens in Postmenopause: The State of the Art from a Chemical, Pharmacological and Regulatory Perspective
Source: PubMed Central journal article supplement — Curr Med Chem. 2014 Feb;21(4):417–36. doi: 10.2174/09298673113206660297 (PMC3963458; doi:10.2174/09298673113206660297), 2014-02
Supplement: CMC-21-417_S1.pdf [file CMC-21-417_S1.pdf]

## Supplementary Material

## Phytoestrogens in Postmenopause: The State of the Art from a Chemical, Pharmacological and Regulatory Perspective

Elisabetta Poluzzi<sup>1</sup>, Carlo Piccinni<sup>1</sup>, Emanuel Raschi<sup>1</sup>, Angela Rampa<sup>2</sup>, Maurizio Recanatini<sup>2</sup> and Fabrizio De Ponti<sup>1,\*</sup>

<sup>1</sup>Pharmacology Unit - Department of Medical and Surgical Sciences, Alma Mater Studiorum, University of Bologna, Bologna, Italy; <sup>2</sup>Department of Pharmacy and Biotechnology, Alma Mater Studiorum, University of Bologna, Bologna, Italy

**Table 1S. Details on Published Reviews and Meta-Analyses on Phytoestrogens According to Relevant Diseases. In the Table "+" Indicates a Potential Benefit, "?" an Uncertain Benefit, and "-" no Benefit.**

| Cardio-Metabolic Disorders |      |                |                     |                                                                                                                                                   |                                                                                                                                                                                                                                                                                      |
|----------------------------|------|----------------|---------------------|---------------------------------------------------------------------------------------------------------------------------------------------------|--------------------------------------------------------------------------------------------------------------------------------------------------------------------------------------------------------------------------------------------------------------------------------------|
| Reference                  | Year | intervention   | Authors' assessment | Outcome                                                                                                                                           | Main results                                                                                                                                                                                                                                                                         |
| Herrington [1]             | 2000 | Phytoestrogens | +                   | LDL, cholesterol, triglycerides (human) and endothelial-dependent vasodilation (monkeys).                                                         | Reduction in LDL, cholesterol and triglycerides levels associated with phytoestrogens may have positive cardiovascular effects.                                                                                                                                                      |
| Glazier [2]                | 2001 | Phytoestrogens | +                   | VLDL, LDL, HDL, cholesterol serum levels.                                                                                                         | Animal and human studies found reduced lipid levels with phytoestrogens.                                                                                                                                                                                                             |
| Ariyo [3]                  | 2002 | Phytoestrogens | +                   | LDL, HDL, cholesterol and triglyceride levels.                                                                                                    | Overall, soy phytoestrogens caused significant reductions of cholesterol, LDL and triglyceride level, while increasing HDL levels.                                                                                                                                                   |
| Ewies [4]                  | 2002 | Phytoestrogens | +                   | LDL, HDL, cholesterol and triglyceride levels.<br>Systemic arterial compliance, blood pressure.                                                   | Isolavones contributed significantly on the cholesterol-lowering effects of soy protein.<br>Effect of isolavones on blood pressure is likely to be small, but significant improvement of systemic arterial compliance.                                                               |
| Messina [5]                | 2002 | Soybeans       | +                   | Platelet aggregation, LDL levels, systemic arterial compliance.                                                                                   | Soy protein and isolavones either reduce or have no effect on platelet aggregation.<br>Soy protein may actually decrease the gallbladder risk by decreasing liver and biliary cholesterol concentrations.<br>Epidemiological data suggest potential cardioprotective effects of soy. |
| Phipps [6]                 | 2002 | Isolavones     | +                   | LDL, HDL levels, systemic arterial compliance, blood pressure, coagulation and fibrinolytic factors.                                              | The consumption of soy protein, as opposed to animal protein, is beneficial from the standpoint of cardiovascular disorder, both for postmenopausal women and humans in general.                                                                                                     |
| Jacquot [7]                | 2003 | Phytoestrogens | ?                   | Nitric oxide release, thromboxane A2 levels, L-type calcium channels.                                                                             | There are contradictory data on endothelium-dependent relaxation caused by phytoestrogens.                                                                                                                                                                                           |
| Altavilla [8]              | 2004 | Genistein      | +                   | Markers of apoptosis, cell differentiation, proliferation, angiogenesis, endothelial nitric oxide, LDL, HDL, brachial artery diameter/blood flow. | In vitro and animal evidence suggest cardio-vascular protective effect of phytoestrogens.<br>Human studies, high amounts of soy proteins appear effective in lowering lipid levels.<br>In humans, genistein clearly improves endothelial vasodilation in post-menopausal women.      |
| McCue [9]                  | 2004 | Soy isolavones | +                   | Cholesterol and LDL levels, blood pressure, platelet aggregation.                                                                                 | Consumption of soy proteins may reduce the risk of coronary heart disease.                                                                                                                                                                                                           |

|                            |             |                     |                            |                                                                                                                                                                                                           |                                                                                                                                                                                                                                                                                                   |
|----------------------------|-------------|---------------------|----------------------------|-----------------------------------------------------------------------------------------------------------------------------------------------------------------------------------------------------------|---------------------------------------------------------------------------------------------------------------------------------------------------------------------------------------------------------------------------------------------------------------------------------------------------|
| Nandur [10]                | 2004        | Phytoestrogens      | +                          | Cholesterol, LDL, HDL and triglyceride levels, systemic arterial compliance, nitric oxide release.                                                                                                        | Data suggest modest effect on cardiovascular biomarkers                                                                                                                                                                                                                                           |
| Cassidy [11]               | 2006        | Phytoestrogens      | +                          | Lipoprotein status and glycaemic indices.                                                                                                                                                                 | The consumption of whole-soyabean foods and soyabean-protein isolates has some beneficial effects on lipid markers of cardiovascular risk in healthy postmenopausal women. There may be an effect of soyabean on diabetes.                                                                        |
| Geller [12]                | 2006        | Isoflavones         | +                          | Cardiovascular risk markers (overall cholesterol, LDL and HDL).                                                                                                                                           | Soy appears to reduce total cholesterol levels and LDL cholesterol, while red clover reduces triglycerides and increases HDL cholesterol.                                                                                                                                                         |
| Usui [13]                  | 2006        | Phytoestrogens      | +                          | Cardio-metabolic risk markers (e.g. LDL, HDL, insulin resistance, body weight).                                                                                                                           | The beneficial effect of phytoestrogens on cardiovascular diseases need to be confirmed. A diet rich in phytoestrogens can have beneficial on many aspects of diabetes and obesity.                                                                                                               |
| Vafeiadou [14]             | 2006        | Isoflavones         | -                          | Cardiovascular risk markers including plasma biomarkers of lipoprotein and glucose metabolism and circulating inflammatory markers (e.g. total cholesterol, HDL-C, triacylglycerol, lipoprotein(a), LDL). | Isoflavone-enriched foods do not have any beneficial effect on markers of lipoprotein and glucose metabolism and cannot improve the concentrations of the majority of circulating inflammatory biomarkers in healthy postmenopausal women.                                                        |
| Cano [15]                  | 2010        | Isoflavones         | +                          | Cardiovascular markers (e.g. total cholesterol, LDL, insulin resistance, platelet activation, adhesion molecules).                                                                                        | Both the experimental and the clinical information suggest that the action of isoflavones substantially overlaps with that of estrogens in what refers to cardiovascular disorders.                                                                                                               |
| Ricci [16]                 | 2010        | Soy isoflavones     | -                          | Fasting blood glucose changes from baseline.                                                                                                                                                              | Soy isoflavones did not affect fasting blood glucose significantly. Difference in fasting blood glucose values between women assigned to isoflavones and women assigned to placebo was -2.16 mg/dL (95% CI, -5.21 to 0.89 mg/dL; P = 0.17).                                                       |
| <b>Aging</b>               |             |                     |                            |                                                                                                                                                                                                           |                                                                                                                                                                                                                                                                                                   |
| <b>Reference</b>           | <b>Year</b> | <b>intervention</b> | <b>Authors' assessment</b> | <b>Outcome</b>                                                                                                                                                                                            | <b>Main results</b>                                                                                                                                                                                                                                                                               |
| Li SH [17]                 | 2010        | Isoflavones         | ?                          | Weighted mean differences (WMD) of endothelial function, measured by flow-mediated dilation (FMD)..                                                                                                       | Isoflavone supplementation does not improve endothelial function in postmenopausal women with high baseline FMD levels (WMD: 0.24%; 95% CI: -0.94% to 1.42%; P = 0.69) but leads to significant improvement in women with low baseline FMD levels (WMD: 2.22%; 95% CI: 1.15%, 3.30%; P = 0.0001). |
| Dong [18]                  | 2011        | Soy isoflavones     | ?                          | C-reactive protein (CRP) change.                                                                                                                                                                          | Insufficient evidence that soy isoflavones significantly reduce CRP concentrations (reduction of 0.17 mg/L 95%CI= -0.38 to 0.04; P = 0.12). However, soy isoflavones may produce a significant reduction in CRP among subjects with elevated baseline CRP.                                        |
| <b>Menopausal Symptoms</b> |             |                     |                            |                                                                                                                                                                                                           |                                                                                                                                                                                                                                                                                                   |
| <b>Reference</b>           | <b>Year</b> | <b>intervention</b> | <b>Authors' assessment</b> | <b>Outcome</b>                                                                                                                                                                                            | <b>Main results</b>                                                                                                                                                                                                                                                                               |
| Glazier [2]                | 2001        | Phytoestrogens      | +                          | Hot flushes and wheat flour.                                                                                                                                                                              | Statistically significant reduction of hot flushes frequency with phytoestrogens.                                                                                                                                                                                                                 |
| Ewies [4]                  | 2002        | Phytoestrogens      | +                          | Hot flushes and night sweats.                                                                                                                                                                             | A statistically significant reduction in hot flushes after a treatment with phytoestrogens was found in different human studies.                                                                                                                                                                  |
| Phipps [6]                 | 2002        | Isoflavones         | ?                          | Hot flushes, genital atrophy.                                                                                                                                                                             | The use of isoflavones appears, at best, to be only modestly successful in addressing vasomotor symptoms, and provides essentially no benefit for symptoms of genital atrophy.                                                                                                                    |

|                       |             |                          |                            |                                                                                        |                                                                                                                                                                                                                                                                                                   |
|-----------------------|-------------|--------------------------|----------------------------|----------------------------------------------------------------------------------------|---------------------------------------------------------------------------------------------------------------------------------------------------------------------------------------------------------------------------------------------------------------------------------------------------|
| Jacquot [7]           | 2003        | Phytoestrogens           | ?                          | Weakly hot flushes                                                                     | Contradictory data on effect of phytoestrogens in contrasting hot flushes via nitric oxide synthase stimulation and L-type calcium channels blockade.                                                                                                                                             |
| Viereck [19]          | 2005        | Actaea racemosa extracts | +                          | Hot flushes, night sweats.                                                             | Statistically significant superiority over placebo has been shown for black cohosh.                                                                                                                                                                                                               |
| Cassidy [11]          | 2006        | Phytoestrogens           | +                          | Hot flushes reduction.                                                                 | Soybean-isoflavone extracts may be effective in reducing hot flushes.                                                                                                                                                                                                                             |
| Howes [20]            | 2006        | Isoflavones              | +                          | Hot flushes reduction.                                                                 | Isoflavone supplementation was found to be associated with a significant reduction in flushes (effect size -0.28, 95% CI -0.39 to -0.18, P < 0.0001).                                                                                                                                             |
| Usui [13]             | 2006        | Phytoestrogens           | ?                          | Hot flushes reduction.                                                                 | The results for phytoestrogens are mixed: some studies report a modest benefit compared with placebo and others do not.                                                                                                                                                                           |
| Williamson [21]       | 2011        | Isoflavones              | ?                          | Hot flushes reduction and modification of circulating hormone levels.                  | There are a marked variability among results of reviewed studies concerning isoflavones.                                                                                                                                                                                                          |
| Hooper [22]           | 2009        | Soy isoflavones          | -                          | Circulating hormone concentrations (estradiol, estrone, SHBG, FSH and LH).             | In post-menopausal women, there were no statistically significant effects of soy isoflavones on estradiol, estrone, SHBG, FSH or LH levels.                                                                                                                                                       |
| <b>Bone Disorders</b> |             |                          |                            |                                                                                        |                                                                                                                                                                                                                                                                                                   |
| <b>Reference</b>      | <b>Year</b> | <b>intervention</b>      | <b>Authors' assessment</b> | <b>Outcome</b>                                                                         | <b>Main results</b>                                                                                                                                                                                                                                                                               |
| Arjmandi [23]         | 2001        | Phytoestrogens           | +                          | Bone mineral density and other indices of bone turnover (e.g., urinary N-telopeptide). | Based on animal and human evidence, flaxseed, dried plums and prunes may reduce bone loss by enhancing antioxidant status.                                                                                                                                                                        |
| Glazier [2]           | 2001        | Phytoestrogens           | +                          | Bone mineral density.                                                                  | Human studies found beneficial effects of ipriflavone in reducing bone loss.                                                                                                                                                                                                                      |
| Ewies [4]             | 2002        | Phytoestrogens           | +                          | Bone mineral density and content.                                                      | Decreased rate of bone loss in human studies for ipriflavone.                                                                                                                                                                                                                                     |
| Messina [5]           | 2002        | Soybeans                 | +                          | Bone mineral density and fracture risk, calcium urinary excretion.                     | Studies in post-menopausal women are generally favourable with effects of soybeans, primarily at the spine.                                                                                                                                                                                       |
| Phipps [6]            | 2002        | Isoflavones              | ?                          | Bone mineral density.                                                                  | The evidence that isoflavones have clinically important beneficial effects on bone for post-menopausal women is not at all substantial.                                                                                                                                                           |
| Jacquot [7]           | 2003        | Phytoestrogens           | ?                          | Osteoblastic and osteoclastic activity.                                                | Hypothesized in vitro osteoblastic stimulatory activity                                                                                                                                                                                                                                           |
| McCue [9]             | 2004        | Soy isoflavones          | +                          | Bone mass and resorption.                                                              | Soybean isoflavonoids have been shown to improve bone mass and reduce bone resorption                                                                                                                                                                                                             |
| Messina [24]          | 2004        | Soy isoflavones          | +                          | Bone mineral density and content.                                                      | The analysis of 15 trials overall suggest that isoflavones exert skeletal benefits in younger postmenopausal women (nearly half of the trials demonstrated statistically significant effects).<br>The epidemiologic literature suggests that soy intake is related to higher bone mineral density |
| Viereck [19]          | 2005        | Actaea racemosa extracts | +                          | Bone density and bone mineral content, bone metabolic index                            | Most studies suggest bone-sparing effects of a phytoestrogen-rich diet only after long-term application.<br>Significant superiority of black cohosh over placebo was demonstrated in one study                                                                                                    |
| Cassidy [11]          | 2006        | Phytoestrogens           | ?                          | Bone biomarkers and bone density                                                       | There is a suggestion, but no conclusive evidence, that isoflavones have a beneficial effect on bone health.                                                                                                                                                                                      |

|                            |             |                     |                            |                                                                                                                                            |                                                                                                                                                                                                                                      |
|----------------------------|-------------|---------------------|----------------------------|--------------------------------------------------------------------------------------------------------------------------------------------|--------------------------------------------------------------------------------------------------------------------------------------------------------------------------------------------------------------------------------------|
| Geller [12]                | 2006        | Isoflavones         | +                          | Bone mineral content (BMC), bone mineral density (BMD), or markers of bone resorption.                                                     | Although the evidence is very limited, it appears that red clover and soy isoflavones may have a somewhat helpful effect on bone mineral density in peri- and postmenopausal women.                                                  |
| Usui [13]                  | 2006        | Phytoestrogens      | ?                          | Bone mass                                                                                                                                  | Soy isoflavones have a modest effect in retarding bone loss                                                                                                                                                                          |
| Ricci [25]                 | 2010        | Soy isoflavones     | -                          | Lumbar spine bone mineral density (LS-BMD)                                                                                                 | The effect of phytoestrogens on LS-BMD was not statistically significant (mean difference 9.86 mg/cm <sup>2</sup> , 95% CI -2.64 to 22.36).                                                                                          |
| SalariSharif [26]          | 2011        | Phytoestrogens      | +                          | Bone resorption biomarkers: changes of pyridinoline (Pyd) and desoxypyridinoline (Dpyd) in urine and serum.                                | The urine Pyd and Dpyd levels decreased significantly in phytoestrogens consumers. Effect size for Pyd levels showed -1.229171 (95% CI=-1.927639 to -0.530703) and for Dpyd -0.520132 (95% CI=-0.871988 to -0.168275), respectively. |
| Williamson [21]            | 2011        | Isoflavones         | ?                          | Bone resorption marker (urinary deoxypyridinoline) and markers of bone formation (bone alkaline phosphatase and osteocalcin).              | Soy isoflavones decreased bone resorption but not bone formation.                                                                                                                                                                    |
| <b>Cognitive Disorders</b> |             |                     |                            |                                                                                                                                            |                                                                                                                                                                                                                                      |
| <b>Reference</b>           | <b>Year</b> | <b>intervention</b> | <b>Authors' assessment</b> | <b>Outcome</b>                                                                                                                             | <b>Main results</b>                                                                                                                                                                                                                  |
| Kim [27]                   | 2000        | Genistein           | +                          | Cognitive dysfunction, Alzheimer disease                                                                                                   | Preliminary experiments showed that isoflavones attenuated neurodegeneration-related modifications in a primate model of menopause                                                                                                   |
| Phipps [6]                 | 2002        | Isoflavones         | ?                          | Cognitive function                                                                                                                         | There is very little information on the effects of isoflavones on cognitive function and/or the development of Alzheimer's disease, although such effects are mechanistically plausible                                              |
| Cassidy [11]               | 2006        | Phytoestrogens      | ?                          | Cognitive tests such as verbal memory, digit span (a measure of short-term memory) and verbal fluency.                                     | It is not possible to draw a conclusion on the effect of soyabean products or isoflavones on cognitive function                                                                                                                      |
| Geller [12]                | 2006        | Isoflavones         | +                          | Improvements in short-term memory, frontal lobe function, mental flexibility, planning ability, category fluency, and sustained attention. | It appears that soy isoflavones could have positive effects on cognitive function in postmenopausal women; however, more research is needed for both soy and red clover isoflavones.                                                 |
| Usui [13]                  | 2006        | Phytoestrogens      | ?                          | Risk of Alzheimer disease and dementia.                                                                                                    | The effects of phytoestrogens on the central nervous system in humans, especially on learning and memory, are controversial .                                                                                                        |
| <b>Neoplasm prevention</b> |             |                     |                            |                                                                                                                                            |                                                                                                                                                                                                                                      |
| <b>Reference</b>           | <b>Year</b> | <b>intervention</b> | <b>Authors' assessment</b> | <b>Outcome</b>                                                                                                                             | <b>Main results</b>                                                                                                                                                                                                                  |
| Horn-Ross [28]             | 1995        | Phytoestrogens      | +                          | Postmenopausal breast cancer risk                                                                                                          | Based on ecologic, experimental, and epidemiologic evidence, the consumption of phytoestrogens may inversely relate to the risk of breast cancer by attenuating the effects of adiposity                                             |
| Glazier [2]                | 2001        | Phytoestrogens      | ?                          | Cell growth (in vitro), tumour size (animal), lobular epithelial growth and urinary excretion (human).                                     | Pre-clinical data suggest antineoplastic activity, but conflicting clinical evidence                                                                                                                                                 |
| Ewies [4]                  | 2002        | Phytoestrogens      | +                          | Cancer cell growth (in vitro), tumour size (animal), cancer occurrence (human).                                                            | Potential chemopreventive effect of Asian diet                                                                                                                                                                                       |

|                |      |                          |   |                                                                                                                |                                                                                                                                                                                                                                                                               |
|----------------|------|--------------------------|---|----------------------------------------------------------------------------------------------------------------|-------------------------------------------------------------------------------------------------------------------------------------------------------------------------------------------------------------------------------------------------------------------------------|
| Lord [29]      | 2002 | Lignans                  | + | Sex hormone binding protein, tumour growth, tumour biomarkers, 2-16 $\alpha$ ratios between hydroxymetabolites | In vitro and in vivo studies showed potential chemopreventive properties by increasing removing endogenous estrogens.<br>Human studies showed that pre- and postmenopausal women with urinary 2/16 $\alpha$ ratios above 2.0 have reduced risk for estrogen-sensitive cancers |
| Messina [5]    | 2002 | Soybeans                 | + | Breast cancer density.                                                                                         | Soy either has no effect on or decreases breast cancer risk.                                                                                                                                                                                                                  |
| Phipps [6]     | 2002 | Isoflavones              | ? | Breast and endometrial cancer risk.                                                                            | Essentially complete lack of direct evidence in decreasing the risk of breast and endometrial cancer.                                                                                                                                                                         |
| Jacquot [7]    | 2003 | Phytoestrogens           | ? | Breast cancer risk.                                                                                            | Phytoestrogens caused a decrease in the apparition of estrogenic and non-estrogenic molecules, but data are inconsistent.                                                                                                                                                     |
| Limer [30]     | 2004 | Phytoestrogens           | + | Breast cancer incidence, proliferation of breast epithelia, growth inhibition.                                 | Rodent studies suggest that soy products may possess antitumour activities.<br>Short-term studies suggest an association between phytoestrogen consumption and a favourable steroid hormone profile.                                                                          |
| McCue [9]      | 2004 | Soy isoflavones          | + | Apoptosis pathways (e.g., p53, caspase-3 activation, down-regulation of BCL-2, activation of Nf-kB).           | In vitro studies found chemo-protective properties associated with soybean foods.                                                                                                                                                                                             |
| Gikas [31]     | 2005 | Phytoestrogens           | ? | Breast cancer risk, mammographic densities.                                                                    | There is no clear evidence that phytoestrogen intake influences the risk of developing breast cancer.                                                                                                                                                                         |
| Mahady [32]    | 2005 | Soy isoflavones          | + | Endometrial cancer risk, endometrial hyperplasia.                                                              | Epidemiological studies suggest that isoflavones may actually reduce the risk of cancer rather than increase it.                                                                                                                                                              |
| Viereck [19]   | 2005 | Actaea racemosa extracts | - | Breast cancer risk, tumour growth.                                                                             | None prospective clinical trials showed a significant protective effect of phytoestrogens.                                                                                                                                                                                    |
| Cassidy [11]   | 2006 | Phytoestrogens           | ? | Mammographic density as a marker of breast cancer risk.<br>Colo-rectal cancer risk.                            | There is some epidemiological evidence of an association between lifelong soybean intake and reduced risk of breast cancer.<br>No general support for the hypothesis that frequent ingestion of soybean reduces the risk of colo-rectal cancer.                               |
| Qin [33]       | 2006 | Soy isoflavones          | + | Breast cancer risk.                                                                                            | The pooled RR of breast cancer for soyfood intake was 0.75 with s 95% CI of 0.59-0.95.                                                                                                                                                                                        |
| Usui [13]      | 2006 | Phytoestrogens           | ? | Breast cancer risk and endometrial cancer risk.                                                                | The overall clinical and epidemiological information on phytoestrogens and breast cancer risk are still scarce. Few studies showed a reduction of endometrial cancer risk with some phytoestrogen compounds.                                                                  |
| Duffy [34]     | 2007 | Phytoestrogens           | - | Breast cancer risk and markers of breast cancer.                                                               | There is very little human data on the role of phytoestrogens in preventing breast cancer recurrence, but the few studies conducted do not support a protective role.                                                                                                         |
| Messina [35]   | 2008 | Soy isoflavones          | ? | Breast proliferation, mammographic density and breast cancer risk.                                             | There are no data to support the idea that soyfoods or isoflavone supplements improve the prognosis of breast cancer patients.                                                                                                                                                |
| Velentzis [36] | 2009 | Lignans                  | + | Breast cancer risk.                                                                                            | Lignans may be associated with a small reduction in post-menopausal breast cancer risk. In particular, high levels lignan intake were associated with reduced breast cancer risk (OR: 0.85, 95% CI: 0.78-0.93).                                                               |
| Buck [37]      | 2010 | Lignans                  | + | Breast cancer risk.                                                                                            | High lignan intake was associated with a significant reduced risk of breast cancer (pooled risk estimate: 0.86; 95%CI: 0.78-0.94).                                                                                                                                            |

|                |      |             |   |                     |                                                                                                                 |
|----------------|------|-------------|---|---------------------|-----------------------------------------------------------------------------------------------------------------|
| Hooper [38]    | 2010 | Isoflavones | ? | Breast density.     | Isoflavones had no effect on breast density in post-menopausal women and a small effect in premenopausal women. |
| Zaineddin [39] | 2012 | Lignans     | + | Breast cancer risk. | Breast cancer risk decreased with increasing serum enterolactone levels (OR: 0.65; 95% CI: 0.52–0.83).          |

## SUPPLEMENTARY REFERENCES

- Herrington, D. Role of estrogens, selective estrogen receptor modulators and phytoestrogens in cardiovascular protection. *Can.J.Cardiol.*, **2000**, 16 Suppl E:5E-9E. 5E-9E.
- Glazier, M.G.; Bowman, M.A. A review of the evidence for the use of phytoestrogens as a replacement for traditional estrogen replacement therapy. *Arch.Intern.Med.*, **2001**, 161(9), 1161-1172.
- Ariyo, A.A.; Villablanca, A.C.: Estrogens and lipids. Can HRT designer estrogens, and phytoestrogens reduce cardiovascular risk markers after menopause? *Postgrad.Med.*, **2002**, 111(1), 23-30.
- Ewies, A.A.: Phytoestrogens in the management of the menopause: up-to-date. *Obstet.Gynecol.Surv.*, **2002**, 57(5), 306-313.
- Messina, M.J.: Soy foods and soybean isoflavones and menopausal health. *Nutr.Clin.Care.*, **2002**, 5(6), 272-282.
- Phipps, W.R.; Duncan, A.M.; Kurzer, M.S.: Isoflavones and postmenopausal women: a critical review. *Treat.Endocrinol.*, **2002**, 1(5), 293-311.
- Jacquot, Y.; Rojas, C.; Refouvet, B.; Robert, J.F.; Leclercq, G.; Xicluna, A.: Recent advances in the development of phytoestrogens and derivatives: an update of the promising perspectives in the prevention of postmenopausal diseases. *Mini.Rev.Med.Chem.*, **2003**, 3(5), 387-400.
- Altavilla, D.; Crisafulli, A.; Marini, H.; Esposito, M.; D'Anna, R.; Corrado, F.; Bitto, A.; Squadrito, F.: Cardiovascular effects of the phytoestrogen genistein. *Curr.Med.Chem.Cardiiovasc.Hematol.Agents.*, **2004**, 2(2), 179-186.
- McCue, P.; Shetty, K.: Health benefits of soy isoflavonoids and strategies for enhancement: a review. *Crit.Rev.Food.Sci.Nutr.*, **2004**, 44(5), 361-367.
- Nandur, R.; Kumar, K.; Villablanca, A.C.: Cardiovascular actions of selective estrogen receptor modulators and phytoestrogens. *Prev.Cardiol.*, **2004**, 7(2), 73-79.
- Cassidy, A.; Albertazzi, P.; Lise, N., I.; Hall, W.; Williamson, G.; Tetens, I.; Atkins, S.; Cross, H.; Manios, Y.; Wolk, A.; Steiner, C.; Branca, F.: Critical review of health effects of soyabean phyto-oestrogens in post-menopausal women. *Proc.Nutr.Soc.*, **2006**, 65(1), 76-92.
- Geller, S.E.; Studee, L.: Soy and red clover for mid-life and aging. *Climacteric*, **2006**, 9(4), 245-263.
- Usui, T.: Pharmaceutical prospects of phytoestrogens. *Endocr.J.*, **2006**, 53(1), 7-20.
- Vafeiadou, K.; Hall, W.L.; Williams, C.M.: Does genotype and equal-production status affect response to isoflavones? Data from a pan-European study on the effects of isoflavones on cardiovascular risk markers in post-menopausal women. *Proc.Nutr.Soc.*, **2006**, 65(1), 106-115.
- Cano, A.; Garcia-Perez, M.A.; Tarin, J.J.: Isoflavones and cardiovascular disease. *Maturitas*, **2010**, 67(3), 219-226.
- Ricci, E.; Cipriani, S.; Chiaffarino, F.; Malvezzi, M.; Parazzini, F.: Effects of soy isoflavones and genistein on glucose metabolism in perimenopausal and postmenopausal non-Asian women: a meta-analysis of randomized controlled trials. *Menopause*, **2010**, 17(5), 1080-1086.
- Li, S.H.; Liu, X.X.; Bai, Y.Y.; Wang, X.J.; Sun, K.; Chen, J.Z.; Hui, R.T.: Effect of oral isoflavone supplementation on vascular endothelial function in postmenopausal women: a meta-analysis of randomized placebo-controlled trials. *Am.J.Clin.Nutr.*, **2010**, 91(2), 480-486.
- Dong, J.Y.; Wang, P.; He, K.; Qin, L.Q.: Effect of soy isoflavones on circulating C-reactive protein in postmenopausal women: meta-analysis of randomized controlled trials. *Menopause.*, **2011**, 18(11), 1256-1262.
- Viereck, V.; Emons, G.; Wuttke, W.: Black cohosh: just another phytoestrogen? *Trends Endocrinol.Metab.*, **2005**, 16(5), 214-221.
- Howes, L.G.; Howes, J.B.; Knight, D.C.: Isoflavone therapy for menopausal flushes: a systematic review and meta-analysis. *Maturitas*, **2006**, 55(3), 203-211.
- Williamson, G.; Coppens, P.; Serra-Majem, L.; Dew, T.: Review of the efficacy of green tea, isoflavones and aloe vera supplements based on randomized controlled trials. *Food Funct.*, **2011**, 2(12), 753-759.
- Hooper, L.; Ryder, J.J.; Kurzer, M.S.; Lampe, J.W.; Messina, M.J.; Phipps, W.R.; Cassidy, A.: Effects of soy protein and isoflavones on circulating hormone concentrations in pre- and post-menopausal women: a systematic review and meta-analysis. *Hum.Reprod.Update*, **2009**, 15(4), 423-440.
- Arjmandi, B.H.: The role of phytoestrogens in the prevention and treatment of osteoporosis in ovarian hormone deficiency. *J.Am.Coll.Nutr.*, **2001**, 20(5 Suppl), 398S-402S.
- Messina, M.; Ho, S.; Alekel, D.L.: Skeletal benefits of soy isoflavones: a review of the clinical trial and epidemiologic data. *Curr.Opin.Clin.Nutr.Metab.Care.*, **2004**, 7(6), 649-658.
- Ricci, E.; Cipriani, S.; Chiaffarino, F.; Malvezzi, M.; Parazzini, F.: Soy isoflavones and bone mineral density in perimenopausal and postmenopausal Western women: a systematic review and meta-analysis of randomized controlled trials. *J.Womens Health (Larchmt.)*, **2010**, 19(9), 1609-1617.
- Salari, S.P.; Nikfar, S.; Abdollahi, M.: Prevention of bone resorption by intake of phytoestrogens in postmenopausal women: a meta-analysis. *Age (Dordr.)*, **2011**, 33(3), 421-431.
- Kim, H.; Xia, H.; Li, L.; Gewin, J.: Attenuation of neurodegeneration-relevant modifications of brain proteins by dietary soy. *Biofactors*, **2000**, 12(1-4), 243-250.
- Horn-Ross, P.L.: Phytoestrogens, body composition, and breast cancer. *Cancer Causes Control*, **1995**, 6(6), 567-573.
- Lord, R.S.; Bongiovanni, B.; Bralley, J.A.: Estrogen metabolism and the diet-cancer connection: rationale for assessing the ratio of urinary hydroxylated estrogen metabolites. *Altern.Med.Rev.*, **2002**, 7(2), 112-129.
- Limer, J.L.; Speirs, V.: Phyto-oestrogens and breast cancer chemoprevention. *Breast Cancer Res.*, **2004**, 6(3), 119-127.
- Gikas, P.D.; Mokbel, K.: Phytoestrogens and the risk of breast cancer: a review of the literature. *Int.J.Fertil.Womens Med.*, **2005**, 50(6), 250-258.
- Mahady, G.B.: Do soy isoflavones cause endometrial hyperplasia? *Nutr.Rev.*, **2005**, 63(11), 392-397.
- Qin, L.Q.; Xu, J.Y.; Wang, P.Y.; Hoshi, K.: Soyfood intake in the prevention of breast cancer risk in women: a meta-analysis of observational epidemiological studies. *J.Nutr.Sci.Vitaminol.(Tokyo)*, **2006**, 52(6), 428-436.
- Duffy, C.; Perez, K.; Partridge, A.: Implications of phytoestrogen intake for breast cancer. *CA Cancer J.Clin.*, **2007**, 57(5), 260-277.
- Messina, M.J.; Wood, C.E.: Soy isoflavones, estrogen therapy, and breast cancer risk: analysis and commentary. *Nutr.J.*, **2008**, 7:17. doi: 10.1186/1475-2891-7-17. 17.
- Velentzis, L.S.; Cantwell, M.M.; Cardwell, C.; Keshtgar, M.R.; Leathem, A.J.; Woodside, J.V.: Lignans and breast cancer risk in pre- and post-menopausal women: meta-analyses of observational studies. *Br.J.Cancer*, **2009**, 100(9), 1492-1498.
- Buck, K.; Zaineddin, A.K.; Vrieling, A.; Linseisen, J.; Chang-Claude, J.: Meta-analyses of lignans and enterolignans in relation to breast cancer risk. *Am.J.Clin.Nutr.*, **2010**, 92(1), 141-153.
- Hooper, L.; Madhavan, G.; Tice, J.A.; Leinster, S.J.; Cassidy, A.: Effects of isoflavones on breast density in pre- and post-menopausal women: a systematic review and meta-analysis of randomized controlled trials. *Hum.Reprod.Update*, **2010**, 16(6), 745-760.

- [39] Zaineddin, A.K.; Vrieling, A.; Buck, K.; Becker, S.; Linseisen, J.; Flesch-Janys, D.; Kaaks, R.; Chang-Claude, J.: Serum enterolactone and postmenopausal breast cancer risk by estrogen, progesterone and herceptin 2 receptor status. *Int.J.Cancer*, **2012**, 130(6), 1401-1410.

**Table 2S. PICO (Patient/Population, Intervention, Comparison and Outcome) of RCTs of Phytoestrogens Published in the Last 5 Years**

| Ref                   | Year | Patient/Population                                   | Intervention                                                                          | Comparison                                  | Outcome                                                                                                                                                                                            |
|-----------------------|------|------------------------------------------------------|---------------------------------------------------------------------------------------|---------------------------------------------|----------------------------------------------------------------------------------------------------------------------------------------------------------------------------------------------------|
| Okamura [1]           | 2008 | Postmenopausal women with insufficient oestrogens    | Oral administration of <i>Pueraria mirifica</i> powder                                | Placebo                                     | Serum lipid parameters (HDL, LDL, apo-A, apo-B)                                                                                                                                                    |
| Chedraui [2]          | 2008 | Postmenopausal women with increased body mass index  | 80 mg red clover (isoflavones) daily for a 90-day                                     | Placebo                                     | Lipid profile total cholesterol (TC), triglycerides, high-density lipoprotein cholesterol, low-density lipoprotein cholesterol (LDL-C) and lipoprotein A (LpA)                                     |
| Verheus [3]           | 2008 | postmenopausal women ages 60 to 75 years             | soy protein intake containing 99 mg isoflavones daily for 1 year                      | Placebo (milk protein)                      | Mammographic density                                                                                                                                                                               |
| Rios [4]              | 2008 | Postmenopausal women 47-66 years                     | 40 mg of isoflavones                                                                  | Placebo                                     | Cardiovascular risk factors (lipid profile)                                                                                                                                                        |
| Aubertin-Leheudre [5] | 2008 | Obese postmenopausal women                           | 6 months of isoflavone supplement (70 mg)                                             | Placebo                                     | Cardiovascular disease (CVD) risk factors                                                                                                                                                          |
| Törmälä [6]           | 2008 | Postmenopausal women on tibolone treatment           | 52 g of soy protein containing 112 mg of isoflavones                                  | Placebo                                     | Effects of soy on sex steroids and vascular inflammation markers                                                                                                                                   |
| Appt [7]              | 2008 | Postmenopausal women on tibolone treatment           | 52 g of soy protein containing 112 mg isoflavones daily for 8 weeks                   | Placebo                                     | Effect on lipids (LDL, HDL)                                                                                                                                                                        |
| Nasca [8]             | 2008 | Healthy postmenopausal women                         | Diet in which 0.5 cups of soy nuts (25 g soy protein and 101 mg aglycone isoflavones) | Placebo (therapeutic lifestyle change diet) | Markers of inflammation                                                                                                                                                                            |
| Atteritano [9]        | 2008 | Postmenopausal women                                 | Genistein (54 mg/day) for 1 year                                                      | Placebo                                     | Cytogenetic biomarkers                                                                                                                                                                             |
| Hallund [10]          | 2008 | Healthy postmenopausal women                         | Daily a low-fat muffin, with a lignan complex, for 6 weeks                            | Placebo                                     | Inflammation markers (C-reactive protein)                                                                                                                                                          |
| Pop [11]              | 2008 | Healthy postmenopausal women                         | Soy isoflavones administered daily for 84 days                                        | Placebo                                     | DNA damage, apoptosis, and oestrogenic outcomes                                                                                                                                                    |
| Marini [12]           | 2008 | Osteopenic postmenopausal women                      | Genistein, (n = 198; 54 mg/d)+ Vit D for 2 years                                      | Placebo + Vit D                             | Bone turnover (serum levels of both soluble RANKL and OPG and the sRANKL/OPG ratio)                                                                                                                |
| Jou [13]              | 2008 | Healthy menopausal women                             | 35 mg of isoflavones daily for 1 week                                                 | Placebo                                     | Menopausal symptoms were evaluated using a modified Kupperman Index                                                                                                                                |
| Powles [14]           | 2008 | Women with a family history of breast cancer         | 40 mg red clover isoflavone for 3 years                                               | Placebo                                     | Prevention of breast cancer                                                                                                                                                                        |
| Brink [15]            | 2008 | Healthy early postmenopausal women                   | Mean daily intake of 110 mg isoflavone aglycones for 1 year                           | Placebo                                     | Bone mineral density of the lumbar spine and total body, markers of bone formation and bone resorption                                                                                             |
| Manonai [16]          | 2008 | Healthy postmenopausal women aged 45 to 60 years old | 20, 30, or 50 mg <i>Pueraria mirifica</i> in capsules once daily for 24 weeks         | Placebo                                     | Lipid profiles, bone-specific alkaline phosphatase level, endometrial thickness, endometrial histology, breast ultrasonography, complete blood count, liver function test, and renal function test |
| Rios [17]             | 2008 | Postmenopausal women                                 | 40 mg of soy isoflavone once a day for                                                | Placebo                                     | Effects of isoflavones on the coagu-                                                                                                                                                               |



| Ref             | Year | Patient/Population                                           | Intervention                                                                                                                        | Comparison                                                                    | Outcome                                                                                                                                                                                                          |
|-----------------|------|--------------------------------------------------------------|-------------------------------------------------------------------------------------------------------------------------------------|-------------------------------------------------------------------------------|------------------------------------------------------------------------------------------------------------------------------------------------------------------------------------------------------------------|
|                 |      |                                                              | 6 months                                                                                                                            |                                                                               | lation and fibrinolytic system                                                                                                                                                                                   |
| Törmälä [18]    | 2008 | Women using tibolone for 3-60 months                         | Soy drink (52 g of soy protein containing 112 mg of isoflavones) for 8 weeks                                                        | Placebo                                                                       | Vascular function (Arterial stiffness and endothelial function)                                                                                                                                                  |
| Greany [19]     | 2008 | Postmenopausal women                                         | Soy protein isolate (26+/-5 g protein containing 44+/-8 mg isoflavones per day) for 6 weeks                                         | Placebo (milk protein)                                                        | Markers of inflammation (Concentrations of Hcy, CRP, sE-selectin, sVCAM-1 and sICAM-1)                                                                                                                           |
| Terzic [20]     | 2009 | Healthy postmenopausal women with an average age of 56 years | Red clover-derived isoflavone medication                                                                                            | Placebo                                                                       | Total blood cholesterol, cholesterol fractions and triglycerides                                                                                                                                                 |
| Beavers [21]    | 2009 | Postmenopausal women                                         | 3 servings of vanilla soy per day for 4 weeks                                                                                       | Placebo (reduced fat dairy milk)                                              | Plasma markers of inflammation (tumor necrosis factor alpha [TNF-alpha], interleukin [IL]-1beta, IL-6) and oxidative stress (superoxide dismutase [SOD], glutathione peroxidase [GPx], cyclooxygenase-2 [COX-2]) |
| Wong [22]       | 2009 | Postmenopausal women                                         | 80 or 120 mg of soy hypocotyl aglycone isoflavones plus calcium and vitamin D                                                       | Placebo                                                                       | Changes in whole-body and regional bone mineral density (BMD), bone mineral content (BMC), and T scores were assessed                                                                                            |
| Maki [23]       | 2009 | Midlife women with 35 or more weekly hot flashes             | Red clover (120 mg), black cohosh (128 mg), 0.625 mg conjugated equine oestrogens plus 2.5 mg medroxyprogesterone acetate (CEE/MPA) | Placebo                                                                       | Cognitive function                                                                                                                                                                                               |
| Moraes [24]     | 2009 | Postmenopausal women                                         | Topical administration of isoflavones 40% (genistein 4%) on facial skin for 24 weeks                                                | Topical administration of beta-oestradiol (0.01%) on facial skin for 24 weeks | Skin morphological parameters                                                                                                                                                                                    |
| Basaria [25]    | 2009 | Healthy, ambulatory, post-menopausal women                   | 20 g of soy protein containing 160 mg of total isoflavones                                                                          | Placebo                                                                       | Self-reported quality of life (QOL), cognition, lipoproteins and androgen status                                                                                                                                 |
| Maskarinec [26] | 2009 | Postmenopausal women                                         | 80 or 120 mg/d of isoflavones for 2 years                                                                                           | Placebo                                                                       | Mammographic density                                                                                                                                                                                             |
| D'Anna [27]     | 2009 | Postmenopausal women                                         | Phytoestrogen genistein                                                                                                             | Placebo                                                                       | Reductions from the baseline in the frequency and severity of hot flashes                                                                                                                                        |
| Villa [28]      | 2009 | Postmenopausal women                                         | 54 mg/d genistein for 24 weeks                                                                                                      | Placebo                                                                       | Cardiovascular risk factors (Anthropometric measures, hormonal and lipid assays, oral glucose tolerance test)                                                                                                    |
| Charles [29]    | 2009 | Healthy postmenopausal women                                 | 20 g of soy protein with 160 mg of total isoflavones (64 mg genistein, 63 mg daidzein, and 34 mg glycitein) for 12 weeks            | Placebo                                                                       | Metabolic and inflammatory markers (glucose, insulin, and adipokines/cytokines)                                                                                                                                  |
| Del Giorno [30] | 2010 | Women aged 45-65 years with menopausal symptoms              | 40 mg Trifolium pratense, 1 capsule/day for 12 months                                                                               | Placebo                                                                       | Kupperman Menopausal Index and the Golombok Rust Inventory of Sexual Satisfaction (GRISS) were used                                                                                                              |
| Bitto [31]      | 2010 | Osteopenic, postmenopausal women                             | 54 mg of genistein aglycone daily plus calcium and vitamin D(3) at therapeutic                                                      | Placebo + calcium and vitamin D(3)                                            | Serum thyroid hormones or autoantibodies                                                                                                                                                                         |

| Ref             | Year | Patient/Population                                                                     | Intervention                                                                                                                                | Comparison                                                             | Outcome                                                                                                                                                                                                               |
|-----------------|------|----------------------------------------------------------------------------------------|---------------------------------------------------------------------------------------------------------------------------------------------|------------------------------------------------------------------------|-----------------------------------------------------------------------------------------------------------------------------------------------------------------------------------------------------------------------|
|                 |      |                                                                                        | doses                                                                                                                                       |                                                                        |                                                                                                                                                                                                                       |
| Liu [32]        | 2010 | Postmenopausal Hong Kong Chinese women with prediabetes or early untreated diabetes    | 15 g soy protein and 100 mg isoflavones, 15 g milk protein and 100 mg isoflavones for 6 months                                              | Placebo (15 g milk protein on a daily basis for 6 mo)                  | Glycaemic control and insulin resistance                                                                                                                                                                              |
| Llaneza [33]    | 2010 | Postmenopausal women with insulin resistance                                           | Mediterranean diet, physical exercise, and daily oral ingestion of 40 mg of soy isoflavones                                                 | Mediterranean diet and physical exercise                               | Anthropometric measures, Kupperman Index values, Cervantes Scale score, and blood samples for glucose, insulin, lipid profile, creatinine, uric acid, homocysteine, folic acid, vitamin B12, selenium, and oestradiol |
| Campbell [34]   | 2010 | Hypercholesterolemic postmenopausal women                                              | Soy or daily for 1 year                                                                                                                     | Placebo                                                                | Heart disease risk. Serum samples were analyzed for total cholesterol, low-density lipoprotein cholesterol, high-density lipoprotein cholesterol, triglycerides, apolipoprotein (Apo) A, and Apo B                    |
| Matvienko [35]  | 2010 | Healthy postmenopausal women                                                           | Soy isoflavone (80 or 120 mg/d) tablets for 12 months                                                                                       | Placebo                                                                | Changes in body composition (whole-body lean mass, whole-body fat mass, android fat mass, and androidal-to-gynoidal fat mass ratio) and appetitive hormones (insulin, leptin, ghrelin, and adiponectin)               |
| Lipovac [36]    | 2010 | Postmenopausal women aged 40 or more                                                   | Two daily capsules of 80mg red clover isoflavones                                                                                           | Placebo                                                                | Anxiety and depressive symptoms with the Hospital Anxiety and Depression Scale (HADS) and Zung's Self Rating Depression Scale (SDS)                                                                                   |
| Simbalista [37] | 2010 | Women who had been postmenopausal for 1-10 y                                           | 2 slices of bread containing 25 g of flaxseed (46 mg lignans) every day for 12 consecutive weeks                                            | Wheat bran (<1 mg lignans; control) every day for 12 consecutive weeks | Daily number of hot flashes, the Kupperman Menopausal Index (KMI), and endometrial thickness.                                                                                                                         |
| Liu [38]        | 2010 | Postmenopausal Chinese women with mild hyperglycemia                                   | 15 g soy protein and 100 mg isoflavones (Soy group), or 15 g milk protein and 100 mg isoflavones (Iso group), on a daily basis for 6 months | 15 g milk protein (placebo group) on a daily basis for 6 months        | Changes of body weight (BW), body mass index,                                                                                                                                                                         |
| Alekel [39]     | 2010 | Healthy postmenopausal women (aged 45.8-65.0 y)                                        | 2 soy isoflavone groups (80 compared with 120 mg/d)                                                                                         | Placebo                                                                | Lumbar spine, total proximal femur, femoral neck, and whole-body BMD                                                                                                                                                  |
| Gobert [40]     | 2010 | Adults with diet-controlled type 2 diabetes                                            | Soya protein isolate (SPI) and milk protein isolate (MPI) for 57 d each separated by a 4-weeks washout                                      | Placebo                                                                | Glycaemic control                                                                                                                                                                                                     |
| Marini [41]     | 2010 | Postmenopausal women with low bone mass for 24 months                                  | 54 mg of genistein aglycone daily + calcium and vitamin D(3)                                                                                | Placebo + calcium and vitamin D(3)                                     | Blood lipid profiles, fasting glucose and insulin, insulin resistance (HOMA-IR), fibrinogen, osteoprotegerin (OPG) and homocysteine were measured                                                                     |
| Hodis [42]      | 2011 | Postmenopausal women 45 to 92 years of age without diabetes and cardiovascular disease | Daily doses of 25 g soy protein containing 91 mg aglycon isoflavone equivalents for 2.7 years                                               | Placebo                                                                | Subclinical atherosclerosis assessed as carotid artery intima-media thickness progression.                                                                                                                            |

| Ref                   | Year | Patient/Population                                                                                                          | Intervention                                                                                                                                                                                                                                               | Comparison                                                                               | Outcome                                                                                                                                                                                                                  |
|-----------------------|------|-----------------------------------------------------------------------------------------------------------------------------|------------------------------------------------------------------------------------------------------------------------------------------------------------------------------------------------------------------------------------------------------------|------------------------------------------------------------------------------------------|--------------------------------------------------------------------------------------------------------------------------------------------------------------------------------------------------------------------------|
| Riesco [43]           | 2011 | Postmenopausal women                                                                                                        | Phytoestrogen supplements                                                                                                                                                                                                                                  | Placebo                                                                                  | Body weight, fat mass and lean body mass were assessed. Quality of life was estimated by the Short Form-36 (SF-36) and Perceived Stress Scale-10 (PSS-10) questionnaires, and menopausal symptoms by the Kupperman index |
| Wang [44]             | 2011 | Healthy postmenopausal women                                                                                                | Diet supplemented with soy food (SFD; 50 mg isoflavones per day)                                                                                                                                                                                           | Diet with no soy food                                                                    | Potential of gene expression profiling in peripheral blood mononuclear cells                                                                                                                                             |
| Gossell-Williams [45] | 2011 | Women who had undergone natural menopause or had iatrogenically entered the climacteric due to surgery for benign pathology | Pumpkin seed oil                                                                                                                                                                                                                                           | Placebo                                                                                  | Serum lipids, fasting plasma glucose and blood pressure                                                                                                                                                                  |
| Tousen [46]           | 2011 | Non-equol-producing menopausal Japanese women                                                                               | 2 mg of equol supplement per day, 6 mg of equol supplement per day, and 10 mg of equol supplement per day                                                                                                                                                  | Placebo                                                                                  | Effects of equol on bone metabolism and serum sex and thyroid hormone levels                                                                                                                                             |
| Choquette [47]        | 2011 | Obese postmenopausal women                                                                                                  | Isoflavones (70 mg/d of isoflavones), exercise and isoflavones                                                                                                                                                                                             | Placebo, exercise and placebo                                                            | Fat mass (FM), lean body mass (LBM), bone mineral density, lipid profile, fasting glucose, fasting insulin and insulin resistance                                                                                        |
| Steinberg [48]        | 2011 | Healthy postmenopausal women                                                                                                | 80 or 120 mg aglycone equivalent soy hypocotyl isoflavones plus calcium and vitamin D                                                                                                                                                                      | Placebo                                                                                  | Blood lymphocyte or serum free thyroxine concentrations, endometrial thickness or fibroids.                                                                                                                              |
| Evans [49]            | 2011 | Postmenopausal women                                                                                                        | Single 30 mg dose of synthetic genistein                                                                                                                                                                                                                   | Placebo                                                                                  | Percentage change in the number of daily hot flushes from pre-treatment to week 12                                                                                                                                       |
| Llaneza [50]          | 2011 | Healthy obese postmenopausal women                                                                                          | 1200 kcal diet, exercise, and daily oral intake of daily oral intake of a soy isoflavones extract (Fisiogen®) contained 200 mg of Glycine max, which corresponded to 80 mg of isoflavone (60.8 mg of genistein, 16 mg of daidzein and 3.2 mg of glicitein) | 1200 kcal diet and exercise group                                                        | Anthropometric measures, body composition, leptin, adiponectin, TNF-alpha, homocysteine, C-reactive protein, glucose, insulin, lipid profile and oestradiol serum levels, Kupperman index and Cervantes Scale            |
| Hachul [51]           | 2011 | postmenopausal women with insomnia                                                                                          | 80 mg isoflavones daily for 4 months                                                                                                                                                                                                                       | Placebo                                                                                  | Sleep analysis consisted of questionnaires and polysomnography                                                                                                                                                           |
| Le Donne [52]         | 2011 | Postmenopausal women                                                                                                        | Intravaginally 97 µg of genistein daily for 15 days continuously/month for 3 months                                                                                                                                                                        | Intravaginally 5 mg of hyaluronic acid daily for 15 days continuously/month for 3 months | Vaginal and cervical smear, colposcopy, vaginal biopsy were performed                                                                                                                                                    |
| Henderson [53]        | 2012 | Healthy postmenopausal women                                                                                                | Soy isoflavone tablets, 200 mg                                                                                                                                                                                                                             | Placebo                                                                                  | Changes in bone mineral density                                                                                                                                                                                          |
| Jenks [54]            | 2012 | Postmenopausal women (aged 45-65 years), who experienced ≥5 hot flashes/day                                                 | Soy isoflavones                                                                                                                                                                                                                                            | 10, 20, or 40 mg S-equol/day                                                             | Reductions in hot flash frequency                                                                                                                                                                                        |
| Tedeschi [55]         | 2012 | Menopausal women with vaginal dystrophy                                                                                     | Gel containing isoflavones for 4 weeks + daily oral isoflavones                                                                                                                                                                                            | No topical treatment + daily oral isoflavones                                            | Severity of itching, burning, vulvovaginal erythema, vaginal dryness and dyspareunia                                                                                                                                     |

| Ref          | Year | Patient/Population                                                                               | Intervention                                                                                                                                                      | Comparison                               | Outcome                                                                                                                                  |
|--------------|------|--------------------------------------------------------------------------------------------------|-------------------------------------------------------------------------------------------------------------------------------------------------------------------|------------------------------------------|------------------------------------------------------------------------------------------------------------------------------------------|
| Wong [56]    | 2012 | Hypercholesterolemic men and postmenopausal women                                                | Soy foods with high-normal (73 mg/d) isoflavones                                                                                                                  | Soy foods with low (10 mg/d) isoflavones | Variation in LDL and HDL cholesterol levels                                                                                              |
| Ye [57]      | 2012 | Postmenopausal Chinese women, aged 45 to 60 years                                                | Daily doses of 84, and 126 mg of soy germ isoflavones                                                                                                             | Placebo                                  | Hot flush frequency, Kupperman scores, serum 17 $\beta$ -oestradiol, follicle-stimulating hormone, luteinizing hormone, and serum lipids |
| Curtis [58]  | 2012 | Postmenopausal women with type 2 diabetes                                                        | 27 g/day (split dose) flavonoid-enriched chocolate (containing 850 mg flavan-3-ols [90 mg epicatechin] and 100 mg isoflavones [aglycone equivalents]/day) 1 year. | Placebo                                  | Variation in insulin, HDL and LDL levels                                                                                                 |
| Lee [59]     | 2012 | Healthy postmenopausal women aged 68 $\pm$ 7 who were not receiving hormonal replacement therapy | 0.05 mg or 0.1 mg transdermal oestrogen/day                                                                                                                       | 40 or 80 mg oral phytoestrogen/day       | Insulin sensitivity                                                                                                                      |
| Oyama [60]   | 2012 | Postmenopausal Japanese women who were equol nonproducers                                        | 10 mg S-equol/day, or 30 mg S-equol/day                                                                                                                           | Placebo                                  | Skin parameters of crow's-feet wrinkles (area and depth), hydration, transepidermal water loss, and elasticity                           |
| Lipovac [61] | 2012 | Postmenopausal women aged 40 or more                                                             | Two daily capsules of 80 mg red clover isoflavones                                                                                                                | Placebo                                  | Daily hot flush and night sweat frequency and overall menopausal symptom intensity (Kupperman Index)                                     |
| Riesco [62]  | 2012 | Obese women aged between 50 and 70 years                                                         | Exercise with phytoestrogens                                                                                                                                      | Exercise with placebo                    | Body weight, waist circumference, fat mass, and lean body mass                                                                           |

## SUPPLEMENTARY REFERENCES

- Okamura, S.; Sawada, Y.; Satoh, T.; Sakamoto, H.; Saito, Y.; Sumino, H.; Takizawa, T.; Kogure, T.; Chaichantipyuth, C.; Higuchi, Y.; Ishikawa, T.; Sakamaki, T. *Pueraria mirifica* phytoestrogens improve dyslipidemia in postmenopausal women probably by activating estrogen receptor subtypes. *Tohoku J Exp. Med.*, **2008**, 216(4), 341-351.
- Chedraui, P.; San Miguel, G.; Hidalgo, L.; Morocho, N.; Ross, S. Effect of *Trifolium pratense*-derived isoflavones on the lipid profile of postmenopausal women with increased body mass index. *Gynecol. Endocrinol.*, **2008**, 24(11), 620-624.
- Verheus, M.; van Gils, C.H.; Kreijkamp-Kaspers, S.; Kok, L.; Peeters, P.H.; Grobbee, D.E.; van der Schouw, Y.T. Soy protein containing isoflavones and mammographic density in a randomized controlled trial in postmenopausal women. *Cancer Epidemiol. Biomarkers Prev.*, **2008**, 17(10), 2632-2638.
- Rios, D.R.; Rodrigues, E.T.; Cardoso, A.P.; Montes, M.B.; Franceschini, S.A.; Toloi, M.R. Lack of effects of isoflavones on the lipid profile of Brazilian postmenopausal women. *Nutrition*, **2008**, 24(11-12), 1153-1158.
- Aubertin-Leheudre, M.; Lord, C.; Khalil, A.; Dionne, I.J. Isoflavones and clinical cardiovascular risk factors in obese postmenopausal women: a randomized double-blind placebo-controlled trial. *J. Womens Health (Larchmt.)*, **2008**, 17(8), 1363-1369.
- Tormala, R.; Appt, S.; Clarkson, T.B.; Mueck, A.O.; Seeger, H.; Mikkola, T.S.; Ylikorkala, O. Impact of soy supplementation on sex steroids and vascular inflammation markers in postmenopausal women using tibolone: role of equol production capability. *Climacteric.*, **2008**, 11(5), 409-415.
- Appt, S.E.; Tormala, R.; Franke, A.A.; Mikkola, T.S.; Tikkanen, M.J.; Ylikorkala, O.; Clarkson, T.B. Soy-tibolone combination - effect on lipids in postmenopausal monkeys and women. *Maturitas*, **2008**, 60(3-4), 216-222.
- Nasca, M.M.; Zhou, J.R.; Wely, F.K. Effect of soy nuts on adhesion molecules and markers of inflammation in hypertensive and normotensive postmenopausal women. *Am J Cardiol.*, **2008**, 102(1), 84-86.
- Atteritano, M.; Pernice, F.; Mazzaferro, S.; Mantuano, S.; Frisina, A.; D'Anna, R.; Cannata, M.L.; Bitto, A.; Squadrito, F.; Frisina, N.; Buemi, M. Effects of phytoestrogen genistein on cytogenetic biomarkers in postmenopausal women: 1 year randomized, placebo-controlled study. *Eur. J. Pharmacol.*, **2008**, 589(1-3), 22-26.
- Hallund, J.; Tetens, I.; Bugel, S.; Tholstrup, T.; Bruun, J.M. The effect of a lignan complex isolated from flaxseed on inflammation markers in healthy postmenopausal women. *Nutr. Metab. Cardiovasc. Dis.*, **2008**, 18(7), 497-502.
- Pop, E.A.; Fischer, L.M.; Coan, A.D.; Gitzinger, M.; Nakamura, J.; Zeisel, S.H. Effects of a high daily dose of soy isoflavones on DNA damage, apoptosis, and estrogenic outcomes in healthy postmenopausal women: a phase I clinical trial. *Menopause.*, **2008**, 15(4 Pt 1), 684-692.
- Marini, H.; Minutoli, L.; Polito, F.; Bitto, A.; Altavilla, D.; Atteritano, M.; Gaudio, A.; Mazzaferro, S.; Frisina, A.; Frisina, N.; Lubrano, C.; Bonaiuto, M.; D'Anna, R.; Cannata, M.L.; Corrado, F.; Cancellieri, F.; Faraci, M.; Marini, R.; Adamo, E.B.; Wilson, S.; Squadrito, F. OPG and sRANKL serum concentrations in osteopenic, postmenopausal women after 2-year genistein administration. *J. Bone Miner. Res.*, **2008**, 23(5), 715-720.
- Jou, H.J.; Wu, S.C.; Chang, F.W.; Ling, P.Y.; Chu, K.S.; Wu, W.H. Effect of intestinal production of equol on menopausal symptoms in women treated with soy isoflavones. *Int. J. Gynaecol. Obstet.*, **2008**, 102(1), 44-49.

- [14] Powles, T.J.; Howell, A.; Evans, D.G.; McCloskey, E.V.; Ashley, S.; Greenhalgh, R.; Affen, J.; Flook, L.A.; Tidy, A. Red clover isoflavones are safe and well tolerated in women with a family history of breast cancer. *Menopause Int.*, **2008**, 14(1), 6-12.
- [15] Brink, E.; Coxam, V.; Robins, S.; Wahala, K.; Cassidy, A.; Branca, F. Long-term consumption of isoflavone-enriched foods does not affect bone mineral density, bone metabolism, or hormonal status in early postmenopausal women: a randomized, double-blind, placebo controlled study. *Am J Clin. Nutr.*, **2008**, 87(3), 761-770.
- [16] Manonai, J.; Chittacharoen, A.; Udomsubpayakul, U.; Theppisai, H.; Theppisai, U. Effects and safety of Pueraria mirifica on lipid profiles and biochemical markers of bone turnover rates in healthy postmenopausal women. *Menopause*, **2008**, 15(3), 530-535.
- [17] Rios, D.R.; Rodrigues, E.T.; Cardoso, A.P.; Montes, M.B.; Franceschini, S.A.; Toloi, M.R. Effects of isoflavones on the coagulation and fibrinolytic system of postmenopausal women. *Nutrition*, **2008**, 24(2), 120-126.
- [18] Tornala, R.; Appt, S.; Clarkson, T.B.; Groop, P.H.; Ronnback, M.; Ylikorkala, O.; Mikkola, T.S. Equol production capability is associated with favorable vascular function in postmenopausal women using tibolone; no effect with soy supplementation. *Atherosclerosis*, **2008**, 198(1), 174-178.
- [19] Greany, K.A.; Nettleton, J.A.; Wangen, K.E.; Thomas, W.; Kurzer, M.S. Consumption of isoflavone-rich soy protein does not alter homocysteine or markers of inflammation in postmenopausal women. *Eur. J. Clin. Nutr.*, **2008**, 62(12), 1419-1425.
- [20] Terzic, M.M.; Dotlic, J.; Maricic, S.; Mihailovic, T.; Tosic-Race, B. Influence of red clover-derived isoflavones on serum lipid profile in postmenopausal women. *J. Obstet. Gynaecol. Res.*, **2009**, 35(6), 1091-1095.
- [21] Beavers, K.M.; Serra, M.C.; Beavers, D.P.; Cooke, M.B.; Willoughby, D.S. Soymilk supplementation does not alter plasma markers of inflammation and oxidative stress in postmenopausal women. *Nutr. Res.*, **2009**, 29(9), 616-622.
- [22] Wong, W.W.; Lewis, R.D.; Steinberg, F.M.; Murray, M.J.; Cramer, M.A.; Amato, P.; Young, R.L.; Barnes, S.; Ellis, K.J.; Shypailo, R.J.; Fraley, J.K.; Konzelmann, K.L.; Fischer, J.G.; Smith, E.O. Soy isoflavone supplementation and bone mineral density in menopausal women: a 2-y multicenter clinical trial. *Am. J. Clin. Nutr.*, **2009**, 90(5), 1433-1439.
- [23] Maki, P.M.; Rubin, L.H.; Fornelli, D.; Drogos, L.; Banuvar, S.; Shulman, L.P.; Geller, S.E. Effects of botanicals and combined hormone therapy on cognition in postmenopausal women. *Menopause*, **2009**, 16(6), 1167-1177.
- [24] Moraes, A.B.; Haidar, M.A.; Soares Junior, J.M.; Simoes, M.J.; Baracat, E.C.; Patriarca, M.T. The effects of topical isoflavones on postmenopausal skin: double-blind and randomized clinical trial of efficacy. *Eur. J. Obstet. Gynecol. Reprod. Biol.*, **2009**, 146(2), 188-192.
- [25] Basaria, S.; Wisniewski, A.; Dupree, K.; Bruno, T.; Song, M.Y.; Yao, F.; Ojumu, A.; John, M.; Dobs, A.S. Effect of high-dose isoflavones on cognition, quality of life, androgens, and lipoprotein in postmenopausal women. *J. Endocrinol. Invest.*, **2009**, 32(2), 150-155.
- [26] Maskarinec, G.; Verheus, M.; Steinberg, F.M.; Amato, P.; Cramer, M.K.; Lewis, R.D.; Murray, M.J.; Young, R.L.; Wong, W.W. Various doses of soy isoflavones do not modify mammographic density in postmenopausal women. *J. Nutr.*, **2009**, 139(5), 981-986.
- [27] D'Anna, R.; Cannata, M.L.; Marini, H.; Atteritano, M.; Cancellieri, F.; Corrado, F.; Triolo, O.; Rizzo, P.; Russo, S.; Gaudio, A.; Frisina, N.; Bitto, A.; Polito, F.; Minutoli, L.; Altavilla, D.; Adamo, E.B.; Squadrito, F. Effects of the phytoestrogen genistein on hot flushes, endometrium, and vaginal epithelium in postmenopausal women: a 2-year randomized, double-blind, placebo-controlled study. *Menopause*, **2009**, 16(2), 301-306.
- [28] Villa, P.; Costantini, B.; Suriano, R.; Perri, C.; Macri, F.; Ricciardi, L.; Panunzi, S.; Lanzone, A. The differential effect of the phytoestrogen genistein on cardiovascular risk factors in postmenopausal women: relationship with the metabolic status. *J. Clin. Endocrinol. Metab.*, **2009**, 94(2), 552-558.
- [29] Charles, C.; Yuskavage, J.; Carlson, O.; John, M.; Tagalicud, A.S.; Maggio, M.; Muller, D.C.; Egan, J.; Basaria, S. Effects of high-dose isoflavones on metabolic and inflammatory markers in healthy postmenopausal women. *Menopause*, **2009**, 16(2), 395-400.
- [30] del Giorno, C.; Fonseca, A.M.; Bagnoli, V.R.; Assis, J.S.; Soares, J.M., Jr.; Baracat, E.C. Effects of Trifolium pratense on the climacteric and sexual symptoms in postmenopausal women. *Rev. Assoc. Med Bras.*, **2010**, 56(5), 558-562.
- [31] Bitto, A.; Polito, F.; Atteritano, M.; Altavilla, D.; Mazzaferro, S.; Marini, H.; Adamo, E.B.; D'Anna, R.; Granese, R.; Corrado, F.; Russo, S.; Minutoli, L.; Squadrito, F. Genistein aglycone does not affect thyroid function: results from a three-year, randomized, double-blind, placebo-controlled trial. *J. Clin. Endocrinol. Metab.*, **2010**, 95(6), 3067-3072.
- [32] Liu, Z.M.; Chen, Y.M.; Ho, S.C.; Ho, Y.P.; Woo, J. Effects of soy protein and isoflavones on glycemic control and insulin sensitivity: a 6-mo double-blind, randomized, placebo-controlled trial in postmenopausal Chinese women with prediabetes or untreated early diabetes. *Am. J. Clin. Nutr.*, **2010**, 91(5), 1394-1401.
- [33] Llaneza, P.; Gonzalez, C.; Fernandez-Inarrea, J.; Alonso, A.; Diaz-Fernandez, M.J.; Arnott, I.; Ferrer-Barriendas, J. Soy isoflavones, Mediterranean diet, and physical exercise in postmenopausal women with insulin resistance. *Menopause*, **2010**, 17(2), 372-378.
- [34] Campbell, S.C.; Khalil, D.A.; Payton, M.E.; Arjmandi, B.H. One-year soy protein supplementation does not improve lipid profile in postmenopausal women. *Menopause*, **2010**, 17(3), 587-593.
- [35] Matvienko, O.A.; Alekel, D.L.; Genschel, U.; Ritland, L.; Van Loan, M.D.; Koehler, K.J. Appetitive hormones, but not isoflavone tablets, influence overall and central adiposity in healthy postmenopausal women. *Menopause*, **2010**, 17(3), 594-601.
- [36] Lipovac, M.; Chedraui, P.; Gruenhut, C.; Gocan, A.; Stammer, M.; Imhof, M. Improvement of postmenopausal depressive and anxiety symptoms after treatment with isoflavones derived from red clover extracts. *Maturitas*, **2010**, 65(3), 258-261.
- [37] Simbalista, R.L.; Sauerbronn, A.V.; Aldrighi, J.M.; Areas, J.A. Consumption of a flaxseed-rich food is not more effective than a placebo in alleviating the climacteric symptoms of postmenopausal women. *J. Nutr.*, **2010**, 140(2), 293-297.
- [38] Liu, Z.M.; Ho, S.C.; Chen, Y.M.; Ho, Y.P. A mild favorable effect of soy protein with isoflavones on body composition—a 6-month double-blind randomized placebo-controlled trial among Chinese postmenopausal women. *Int. J. Obes. (Lond)*, **2010**, 34(2), 309-318.
- [39] Alekel, D.L.; Van Loan, M.D.; Koehler, K.J.; Hanson, L.N.; Stewart, J.W.; Hanson, K.B.; Kurzer, M.S.; Peterson, C.T. The soy isoflavones for reducing bone loss (SIRBL) study: a 3-y randomized controlled trial in postmenopausal women. *Am J. Clin. Nutr.*, **2010**, 91(1), 218-230.
- [40] Gobert, C.P.; Pipe, E.A.; Capes, S.E.; Darlington, G.A.; Lampe, J.W.; Duncan, A.M. Soya protein does not affect glycaemic control in adults with type 2 diabetes. *Br. J. Nutr.*, **2010**, 103(3), 412-421.
- [41] Marini, H.; Bitto, A.; Altavilla, D.; Burnett, B.P.; Polito, F.; Di, S., V.; Minutoli, L.; Atteritano, M.; Levy, R.M.; Frisina, N.; Mazzaferro, S.; Frisina, A.; D'Anna, R.; Cancellieri, F.; Cannata, M.L.; Corrado, F.; Lubrano, C.; Marini, R.; Adamo, E.B.; Squadrito, F. Efficacy of genistein aglycone on some cardiovascular risk factors and homocysteine levels: A follow-up study. *Nutr. Metab. Cardiovasc. Dis.*, **2010**, 20(5), 332-340.
- [42] Hodis, H.N.; Mack, W.J.; Kono, N.; Azen, S.P.; Shoupe, D.; Hwang-Levine, J.; Petitti, D.; Whitfield-Maxwell, L.; Yan, M.; Franke, A.A.; Selzer, R.H. Isoflavone soy protein supplementation and atherosclerosis progression in healthy postmenopausal women: a randomized controlled trial. *Stroke*, **2011**, 42(11), 3168-3175.
- [43] Riesco, E.; Choquette, S.; Audet, M.; Tessier, D.; Dionne, I.J. Effect of exercise combined with phytoestrogens on quality of life in postmenopausal women. *Climacteric*, **2011**, 14(5), 573-580.
- [44] Wang, J.; Siegmund, K.; Tseng, C.C.; Lee, A.S.; Wu, A.H. Soy food supplementation, dietary fat reduction and peripheral blood gene expression in postmenopausal women—a randomized, controlled trial. *Mol. Nutr. Food Res.*, **2011**, 55 Suppl 2:S264-77. doi: 10.1002/mnfr.201100242. Epub: 2011 Aug 8. S264-S277.
- [45] Gossell-Williams, M.; Hyde, C.; Hunter, T.; Simms-Stewart, D.; Fletcher, H.; McGrowder, D.; Walters, C.A. Improvement in HDL cholesterol in postmenopausal women supplemented with pumpkin seed oil: pilot study. *Climacteric*, **2011**, 14(5), 558-564.
- [46] Tousen, Y.; Ezaki, J.; Fujii, Y.; Ueno, T.; Nishimuta, M.; Ishimi, Y. Natural S-equol decreases bone resorption in postmenopausal, non-equol-producing Japanese women: a pilot randomized, placebo-controlled trial. *Menopause*, **2011**, 18(5), 563-574.

- [47] Choquette, S.; Riesco, E.; Cormier, E.; Dion, T.; Aubertin-Leheudre, M.; Dionne, I.J. Effects of soya isoflavones and exercise on body composition and clinical risk factors of cardiovascular diseases in overweight postmenopausal women: a 6-month double-blind controlled trial. *Br. J. Nutr.*, **2011**, 105(8), 1199-1209.
- [48] Steinberg, F.M.; Murray, M.J.; Lewis, R.D.; Cramer, M.A.; Amato, P.; Young, R.L.; Barnes, S.; Konzelmann, K.L.; Fischer, J.G.; Ellis, K.J.; Shypailo, R.J.; Fraley, J.K.; Smith, E.O.; Wong, W.W. Clinical outcomes of a 2-y soy isoflavone supplementation in menopausal women. *Am. J. Clin. Nutr.*, **2011**, 93(2), 356-367.
- [49] Evans, M.; Elliott, J.G.; Sharma, P.; Berman, R.; Guthrie, N. The effect of synthetic genistein on menopause symptom management in healthy postmenopausal women: a multi-center, randomized, placebo-controlled study. *Maturitas*, **2011**, 68(2), 189-196.
- [50] Llana, P.; Gonzalez, C.; Fernandez-Inarrea, J.; Alonso, A.; Diaz, F.; Arnott, I.; Ferrer-Barriendos, J. Soy isoflavones, diet and physical exercise modify serum cytokines in healthy obese postmenopausal women. *Phytomedicine*, **2011**, 18(4), 245-250.
- [51] Hachul, H.; Brandao, L.C.; D'Almeida, V.; Bittencourt, L.R.; Baracat, E.C.; Tufik, S. Isoflavones decrease insomnia in postmenopause. *Menopause*, **2011**, 18(2), 178-184.
- [52] Le Donne, M.; Caruso, C.; Mancuso, A.; Costa, G.; Iemmo, R.; Pizzimenti, G.; Cavallari, V. The effect of vaginally administered genistein in comparison with hyaluronic acid on atrophic epithelium in postmenopause. *Arch. Gynecol. Obstet.*, **2011**, 283(6), 1319-1323.
- [53] Henderson, V.W.; St John, J.A.; Hodis, H.N.; Kono, N.; McCleary, C.A.; Franke, A.A.; Mack, W.J. Long-term soy isoflavone supplementation and cognition in women: a randomized, controlled trial. *Neurology*, **2012**, 78(23), 1841-1848.
- [54] Jenks, B.H.; Iwashita, S.; Nakagawa, Y.; Ragland, K.; Lee, J.; Carson, W.H.; Ueno, T.; Uchiyama, S. A pilot study on the effects of S-equol compared to soy isoflavones on menopausal hot flash frequency. *J. Womens Health (Larchmt.)*, **2012**, 21(6), 674-682.
- [55] Tedeschi, C.; Benvenuti, C. Comparison of vaginal gel isoflavones versus no topical treatment in vaginal dystrophy: results of a preliminary prospective study. *Gynecol. Endocrinol.*, **2012**, 28(8), 652-654.
- [56] Wong, J.M.; Kendall, C.W.; Marchie, A.; Liu, Z.; Vidgen, E.; Holmes, C.; Jackson, C.J.; Josse, R.G.; Pencharz, P.B.; Rao, A.V.; Vuksan, V.; Singer, W.; Jenkins, D.J. Equal status and blood lipid profile in hyperlipidemia after consumption of diets containing soy foods. *Am. J. Clin. Nutr.*, **2012**, 95(3), 564-571.
- [57] Ye, Y.B.; Wang, Z.L.; Zhuo, S.Y.; Lu, W.; Liao, H.F.; Verbruggen, M.; Fang, S.; Mai, H.Y.; Chen, Y.M.; Su, Y.X. Soy germ isoflavones improve menopausal symptoms but have no effect on blood lipids in early postmenopausal Chinese women: a randomized placebo-controlled trial. *Menopause*, **2012**, 19(7), 791-798.
- [58] Curtis, P.J.; Sampson, M.; Potter, J.; Dhatariya, K.; Kroon, P.A.; Cassidy, A. Chronic ingestion of flavan-3-ols and isoflavones improves insulin sensitivity and lipoprotein status and attenuates estimated 10-year CVD risk in medicated postmenopausal women with type 2 diabetes: a 1-year, double-blind, randomized, controlled trial. *Diabetes Care*, **2012**, 35(2), 226-232.
- [59] Lee, C.C.; Bloem, C.J.; Kasa-Vubu, J.Z.; Liang, L.J. Effect of oral phytoestrogen on androgenicity and insulin sensitivity in postmenopausal women. *Diabetes Obes. Metab.*, **2012**, 14(4), 315-319.
- [60] Oyama, A.; Ueno, T.; Uchiyama, S.; Aihara, T.; Miyake, A.; Kondo, S.; Matsunaga, K. The effects of natural S-equol supplementation on skin aging in postmenopausal women: a pilot randomized placebo-controlled trial. *Menopause*, **2012**, 19(2), 202-210.
- [61] Lipovac, M.; Chedraui, P.; Gruenhut, C.; Gocan, A.; Kurz, C.; Neuber, B.; Imhof, M. The effect of red clover isoflavone supplementation over vasomotor and menopausal symptoms in postmenopausal women. *Gynecol. Endocrinol.*, **2012**, 28(3), 203-207.
- [62] Riesco, E.; Choquette, S.; Audet, M.; Lebon, J.; Tessier, D.; Dionne, I.J. Effect of exercise training combined with phytoestrogens on adipokines and C-reactive protein in postmenopausal women: a randomized trial. *Metabolism*, **2012**, 61(2), 273-280.
